# Supplementary material for: A R2R3-type MYB gene, OsMYB2, is involved in salt, cold, and dehydration tolerance in rice
Source: PubMed Central journal article supplement — J Exp Bot. 2012 Feb 2;63(7):2541–56. doi: 10.1093/jxb/err431 (PMC3346221; doi:10.1093/jxb/err431), 2012-02-02
Supplement: supp_err431_00068346-file003.pdf [file supp_err431_00068346-file003.pdf]

# A R2R3-type MYB gene, *OsMYB2*, is involved in salt, cold and dehydration tolerance in rice

*An Yang, Xiaoyan Dai, and Wen-Hao Zhang*

**Table S1** Primers used in real-time PCR to verify the expression pattern of differentially expressed genes from the microarray experiment.

| Accession number | Forward primer sequence (5'-3') | Reverse primer sequence (5'-3') |
|------------------|---------------------------------|---------------------------------|
| AF009411.1       | CGGATGTTGATTACCGCTGCTT          | TCGAGGATCTCGCCGTAGGTGG          |
| AK061224.1       | CATCGGGCTCGCCAACAT              | CGACGAGTACGCCACCATC             |
| AK064650.1       | TGGAGCACTACAAGGGATTT            | AGGCGAGCAAGGCAGATA              |
| AK069361.1       | CCAACTATAAATACGAGCAA            | CATAAGATGAAAGTGAGGC             |
| AK074025.1       | AAAATGGGTCAAACATAGGAGG          | CGCTACAAGATGCGGAGA              |
| AK102940.1       | TGAGGGTACAGAGCTGACG             | AGGCACCACTGACCAAGA              |
| AK103319         | TACCGTGACAACGATAACA             | TAGGCTCATCTCCATTACA             |
| AK103359.1       | CAAAGCAGTGGGCTATGTG             | TCTCGCTGTGGGTGTTGA              |
| AU100845         | GCGGTCGCACAAGATGAA              | CACGAATGGATGGGATGG              |
| AY181210.1       | ACTATGCTGCTCGTGAGTGTTG          | ACCCTGGTGAAGTGCTGAAA            |
| NM_189846.1      | TGGTCACTGGGAGGTTAT              | CATTGACGCAAGAAGATAA             |
| NM_195383.1      | AAACCAGTCAATGGGATG              | AGCGGAAGGAAGCAGATA              |

**Tables S2 & S3** – see separate files

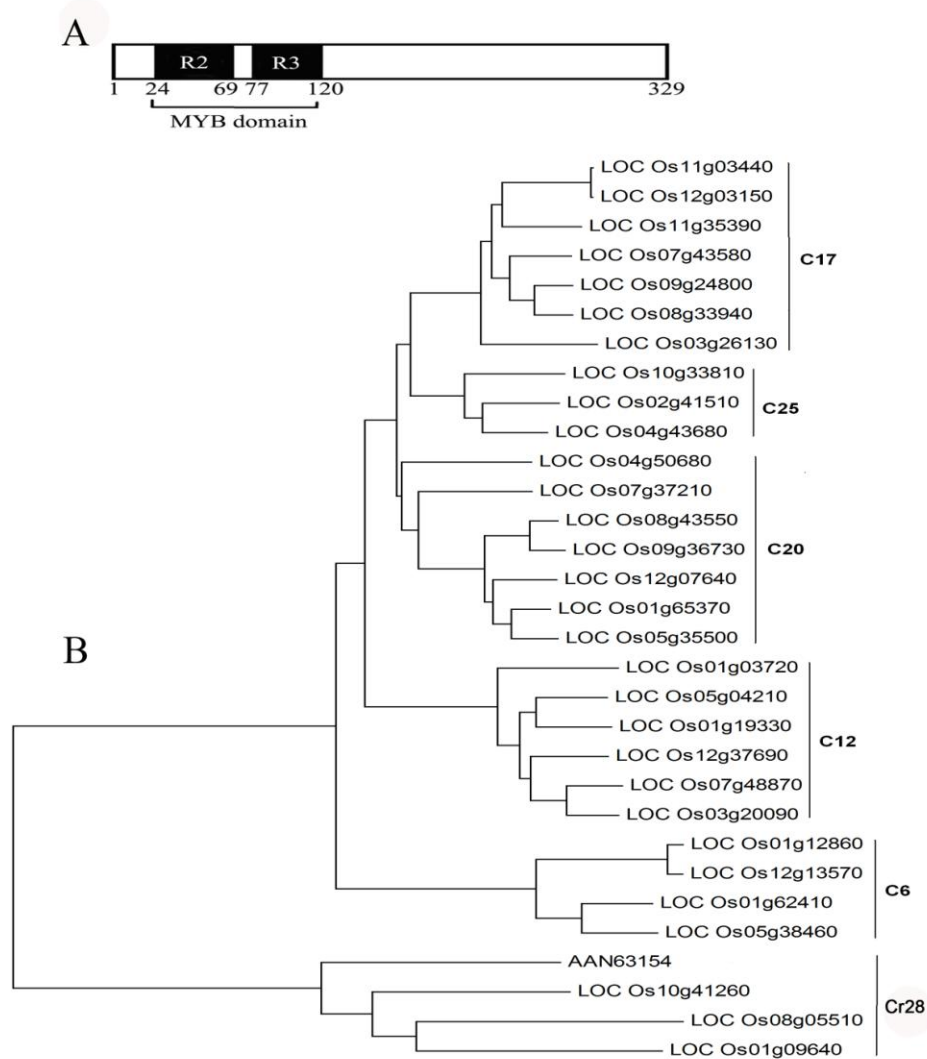

Figure S1. Analyses of *OsMYB2* gene from rice. (A) Structure of *OsMYB2* protein. The MYB domain and two imperfect repeat sequences (R1 and R2) domains are shown. (B) Phylogenetic tree of MYB proteins. The tree was constructed with the DNAMAN tree program with full-length amino acid sequences downloaded from TIGR (<http://www.tigr.org>) and NCBI ([www.ncbi.nlm.nih.gov](http://www.ncbi.nlm.nih.gov)). The locus of *OsMYB2* is LOC\_Os3g20090.

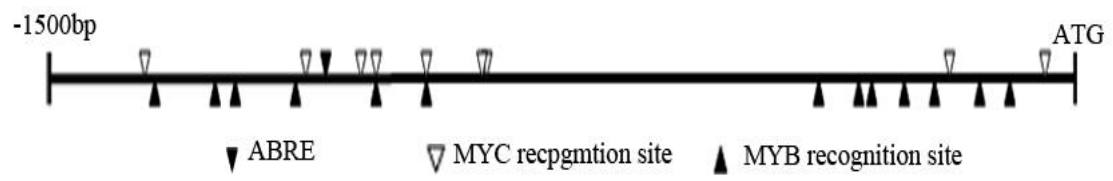

Figure S2. Distribution of stress related *cis*-elements in the *OsMYB2* promoter region.

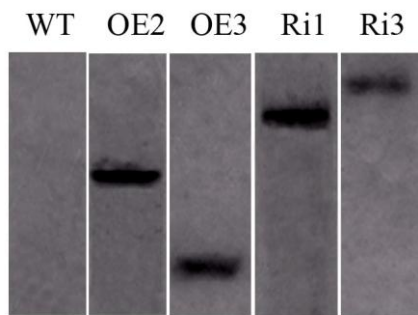

Figure S3. Southern blot analysis of independent transgenic rice lines. Rice genome DNA are digested by *EcoRI*. The blots was hybridized with  $\alpha$ -<sup>32</sup>P-dCTP-labeled *GUS*. WT indicates wild type. OE2 and OE3 represent overexpressing transgenic lines, and Ri1 and Ri3 indicates RNAi transgenic lines.
